# Supplementary material
Source: Springer Nature journal article supplement (https://www.springermedizin.de/resource/supplementary/12888_2013_1841_MOESM3_ESM.pdf/9481460)
Supplement: MOESM3 [file 9481460]

## Study Name

**Effect Size**  
(95% CI)

**Weight**  
%

|                         |                      |      |
|-------------------------|----------------------|------|
| Anhoury (2000)          | 2.75 (-0.32, 5.82)   | 7.37 |
| Bladin (1992)           | 2.80 (-0.32, 5.93)   | 7.33 |
| Christodoulou (2002)    | 1.06 (-0.13, 2.26)   | 8.52 |
| Guarnieri (2009)        | 10.75 (6.30, 15.20)  | 6.28 |
| Jensen (1979)           | 27.03 (16.91, 37.15) | 2.88 |
| Kanemoto (2001)         | 23.08 (11.63, 34.53) | 2.42 |
| Kanner (2009)           | 4.00 (0.16, 7.84)    | 6.77 |
| Lindsay (1979)          | 10.34 (3.95, 16.74)  | 4.82 |
| Manchanda (1993)        | 1.34 (0.04, 2.65)    | 8.47 |
| McLellan (2005)         | 1.67 (-1.57, 4.91)   | 7.24 |
| Oshima (2006)           | 19.44 (11.98, 26.91) | 4.15 |
| Pritchard (1980)        | 10.71 (2.61, 18.82)  | 3.79 |
| Shaw (2004)             | 3.44 (1.44, 5.43)    | 8.12 |
| Sherwin (1981)          | 11.11 (3.35, 18.87)  | 3.98 |
| Tebartz van Elst (2002) | 4.60 (3.23, 5.97)    | 8.44 |
| de Araujo Filho (2007)  | 23.58 (15.50, 31.67) | 3.80 |
| de Olivera (2010)       | 5.50 (0.21, 10.79)   | 5.62 |

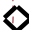

**7.04 (4.95 9.14)**

100.00

-37.1

0

37.1
